# Supplementary material for: Ilimaquinone Induces the Apoptotic Cell Death of Cancer Cells by Reducing Pyruvate Dehydrogenase Kinase 1 Activity
Source: PubMed Central journal article supplement (PMC7504051; doi:10.3390/ijms21176021), 2020-08-21
Supplement: ijms-21-06021-s001.pdf [file ijms-21-06021-s001.pdf]

## 1 Supplementary Materials

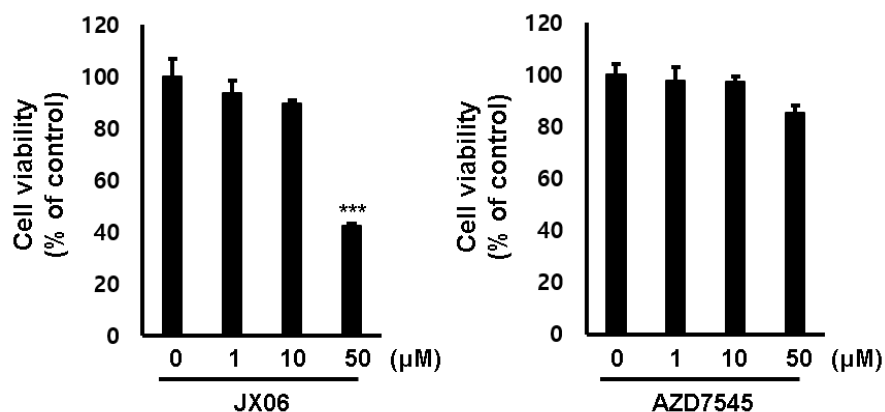

2

3 **Supplementary Figure S1. The cell viabilities of JX06, and AZD7545 in A549 cells.** The cells were treated with  
4 JX06, and AZD7545 for 24 h. All experiments were performed at least three times, and data shown as the mean  
5  $\pm$  SD. Statistical analyses were performed using Student's *t*-test. \*\*\*,  $p < 0.001$  compared with the control.

6

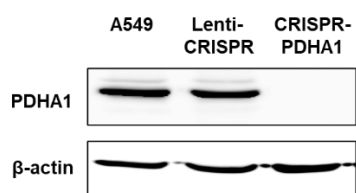

7

8 **Supplementary Figure S2. Construction of PDHA1-knockout A549 cells.** The A549 cells were infected with  
9 lentivirus harboring mock CRISPR vector or PDHA1-knockout vector. The protein expression levels of PDHA1  
10 were determined via western blotting.

11

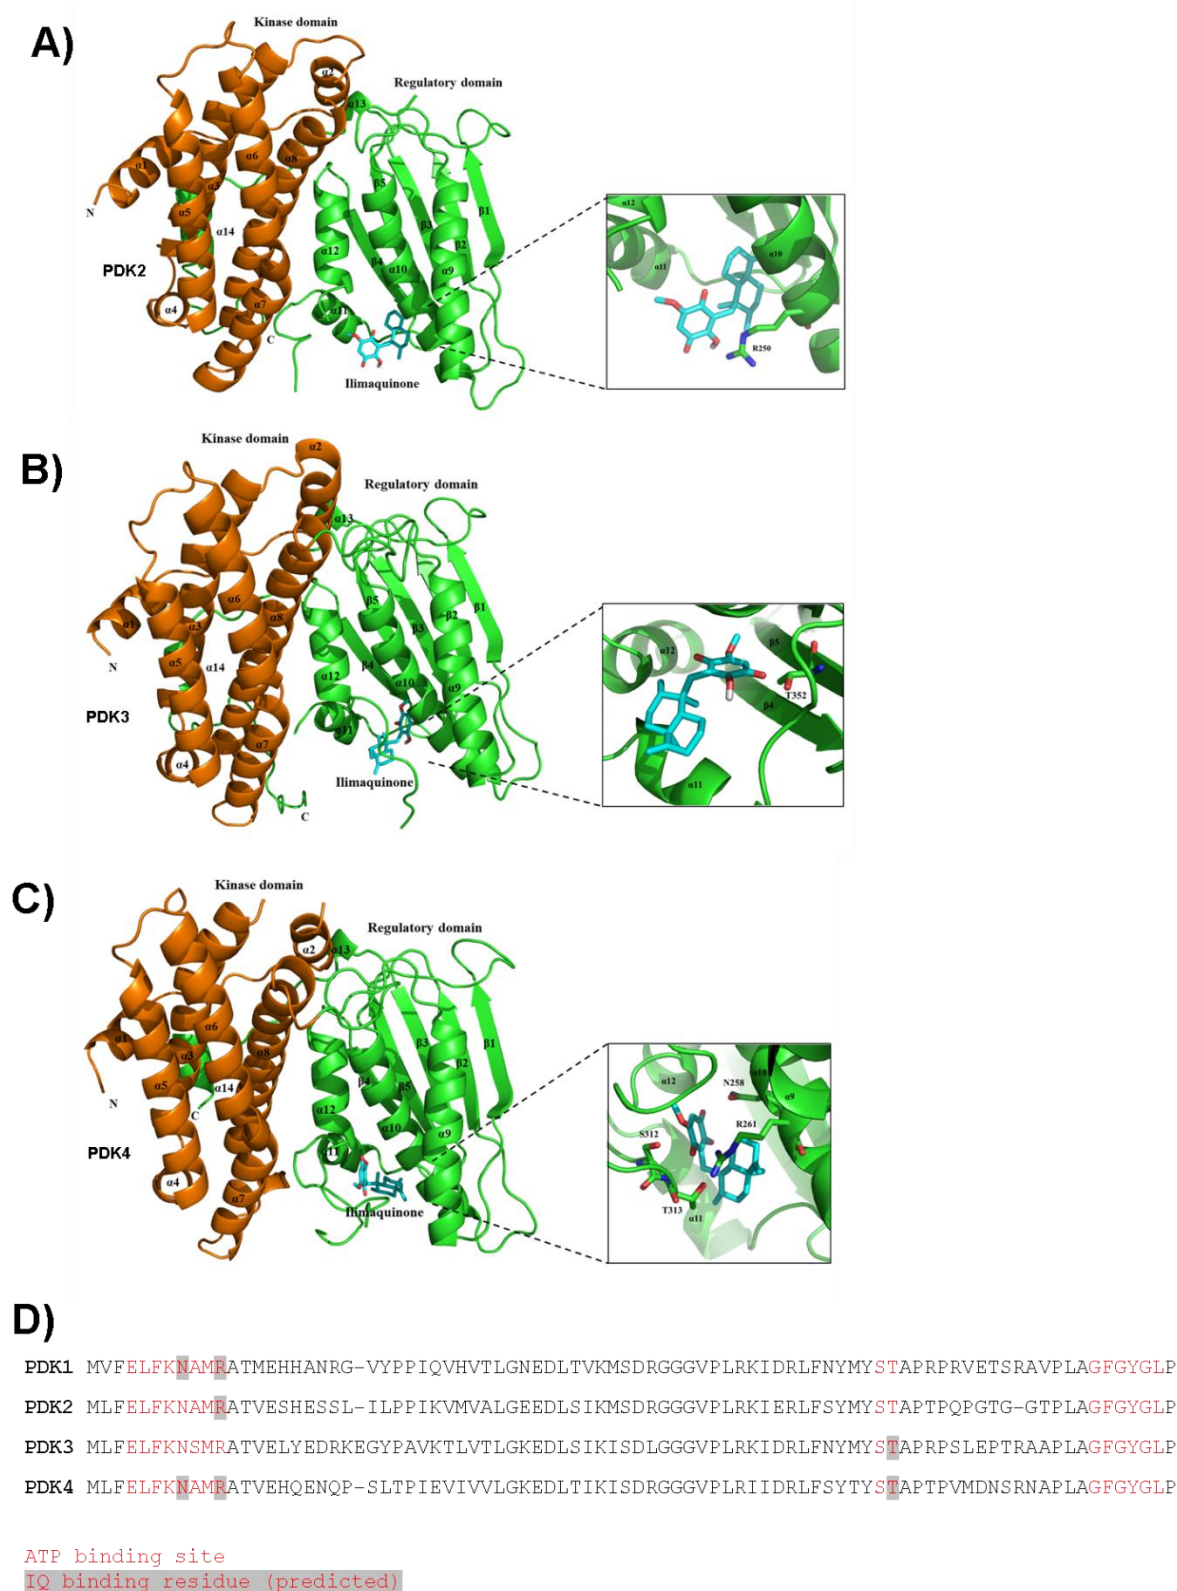

12

13

14

15

**Supplementary Figure S3. The interaction of PDK isoforms with IQ.** The modeled structures of PDK isoforms 2 (PDB ID: 2BTZ), 3 (PDB ID:1Y8N), and 4 (PDB ID: 2E0A) with IQ (CID: 21727418) are shown as ribbons. The interaction residues between a PDK isoform and IQ are shown.

16

17

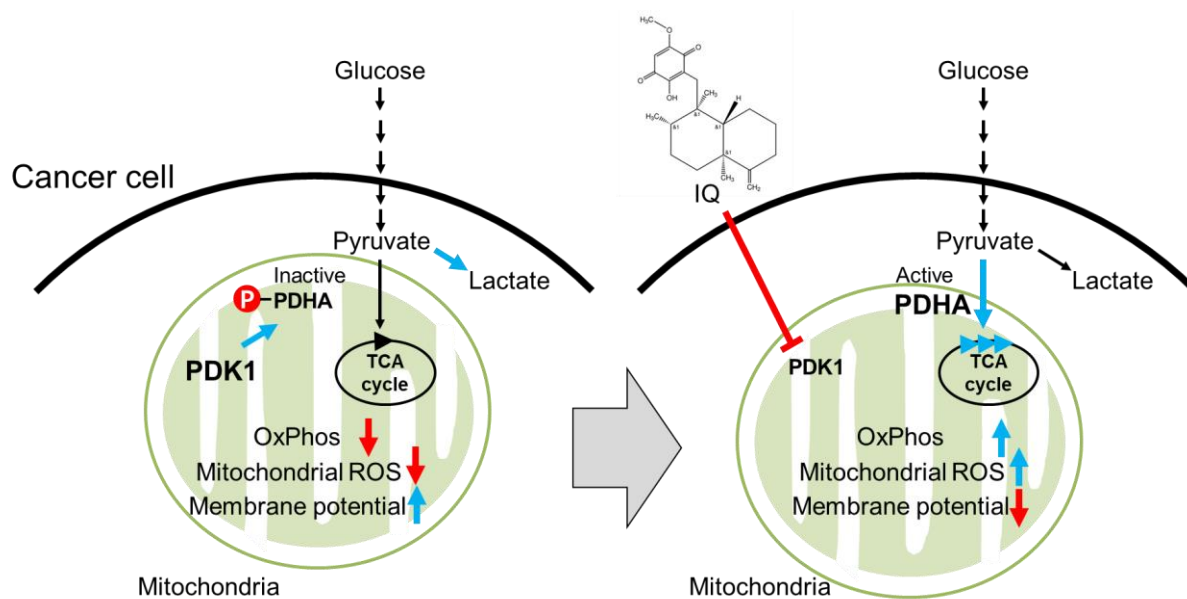

18

19

20

**Supplementary Figure S4.** Schematic diagram of the mechanism of IQ-mediated apoptosis. The red circle and white P indicate phosphates.

21

22
